# Supplementary material for: Clinical and Prognostic Significance of p-ANCA Positivity in Idiopathic Pulmonary Fibrosis: A Retrospective Observational Study
Source: MDPI journal article supplement (doi:10.3390/diagnostics13111882), 2023-05-27
Supplement: s1 [file s1]

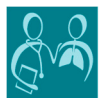

**Table S1.** Association of serological features at the baseline with occurrence of Vasculitis.

| Item related to Vasculitis occurrence | <i>p</i>            | 95%CI      |
|---------------------------------------|---------------------|------------|
| CRP                                   | 0,522               |            |
| ESR                                   | 0,453               |            |
| RF                                    | 0,023 ( $X^2$ 5,14) | 1.09-10.24 |
| ANA $\geq$ 1:80                       | 0,058               |            |
| Blood eosinophils $\geq$ 1000         | n.a.                | n.a.       |
| c-ANCA/anti-PR3                       | 0,712               |            |

Legend: CRP: C reactive protein; ESR: erythro sedimentation rate; RF: rheumatoid factor; ANA: anti-cytoplasmatic antibodies; c-ANCA: perinucleolar anti-neutrophil cytoplasmic antibodies.

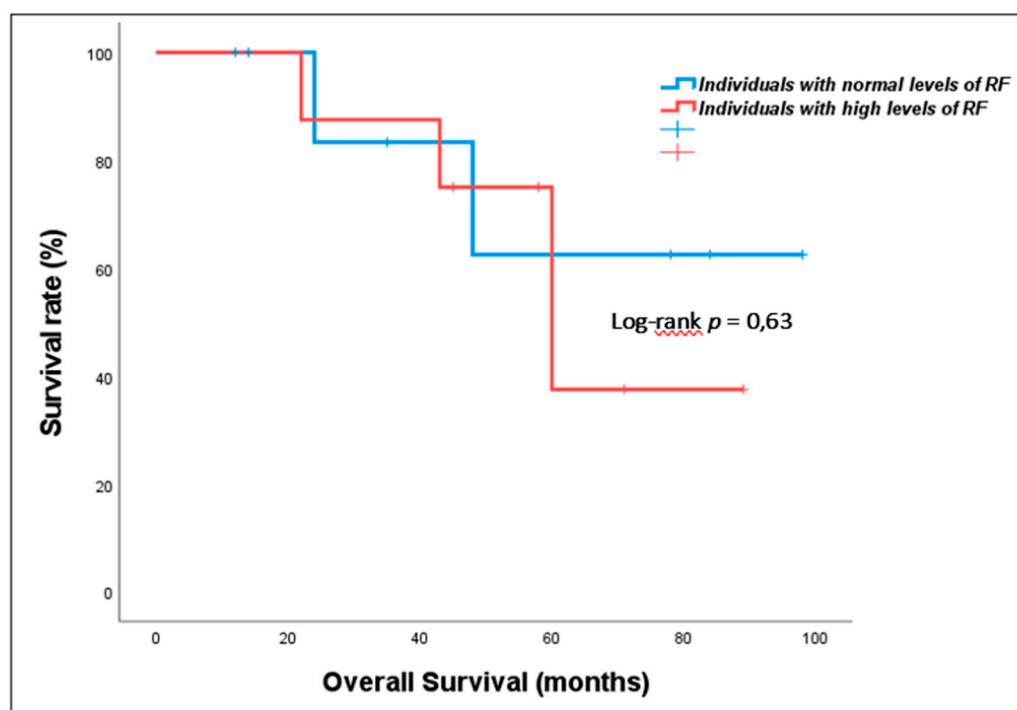

**Figure S1.** Kaplan-Meier curves of subgroups defined by RF levels. (RF: Rheumatoid factor).
